# Supplementary material for: Enriched Alternative Splicing in Islets of Diabetes-Susceptible Mice
Source: MDPI journal article supplement (doi:10.3390/ijms22168597), 2021-08-10
Supplement: s1 [file s1]

## Supplementary Materials

# Enriched alternative splicing in islets of diabetes-susceptible mice

Ilka Wilhelmi <sup>1,2</sup>, Alexander Neumann <sup>3</sup>, Markus Jähnert <sup>1,2</sup>, Meriem Ouni <sup>1,2,†</sup> and Annette Schürmann <sup>1,2,4,5,\*</sup>

<sup>1</sup> Department of Experimental Diabetology, German Institute of Human Nutrition (DIfE), Potsdam, Germany; Ilka.wilhelmi@dife.de (I.W.); Markus.jaehnert@dife.de (M.J.); Meriem.ouni@dife.de (M.O.)

<sup>2</sup> German Center for Diabetes Research (DZD), Munich, Germany

<sup>3</sup> Omiqa Bioinformatics, Berlin, Germany; Alexander.neumann@omiqa.bio

<sup>4</sup> University of Potsdam, Institute of Nutritional Sciences, Nuthetal, Germany

<sup>5</sup> Faculty of Health Sciences, joint Faculty of the Brandenburg University of Technology Cottbus—Senftenberg, the Brandenburg Medical School Theodor Fontane and the University of Potsdam, Germany

† These authors contributed equally to this work.

\* Correspondence: schuermann@dife.de

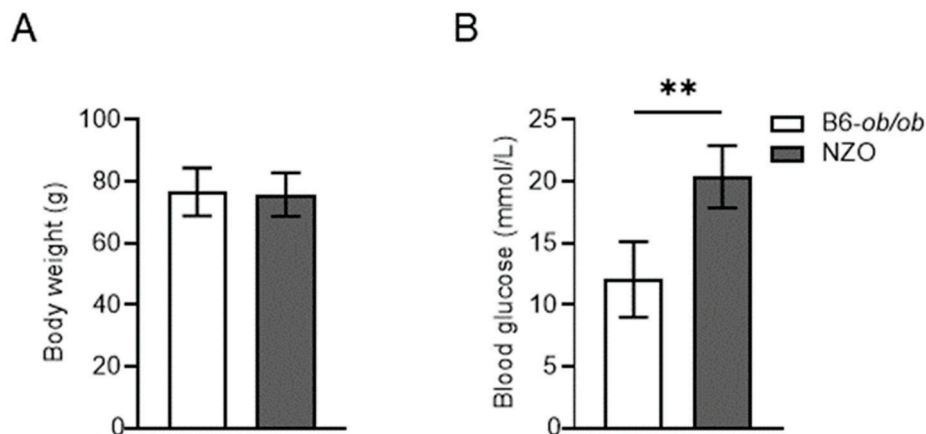

**Supplemental Figure S1.** **A** Body weight of B6-ob/ob and NZO mice at the day of sacrifice (age of 18 weeks). **B** Blood glucose levels of B6-ob/ob and NZO mice at the day of sacrifice. Data is shown as mean  $\pm$  SD from 6 mice per genotype. \*  $p \leq 0.05$ , student's t-test with Welch's correction.

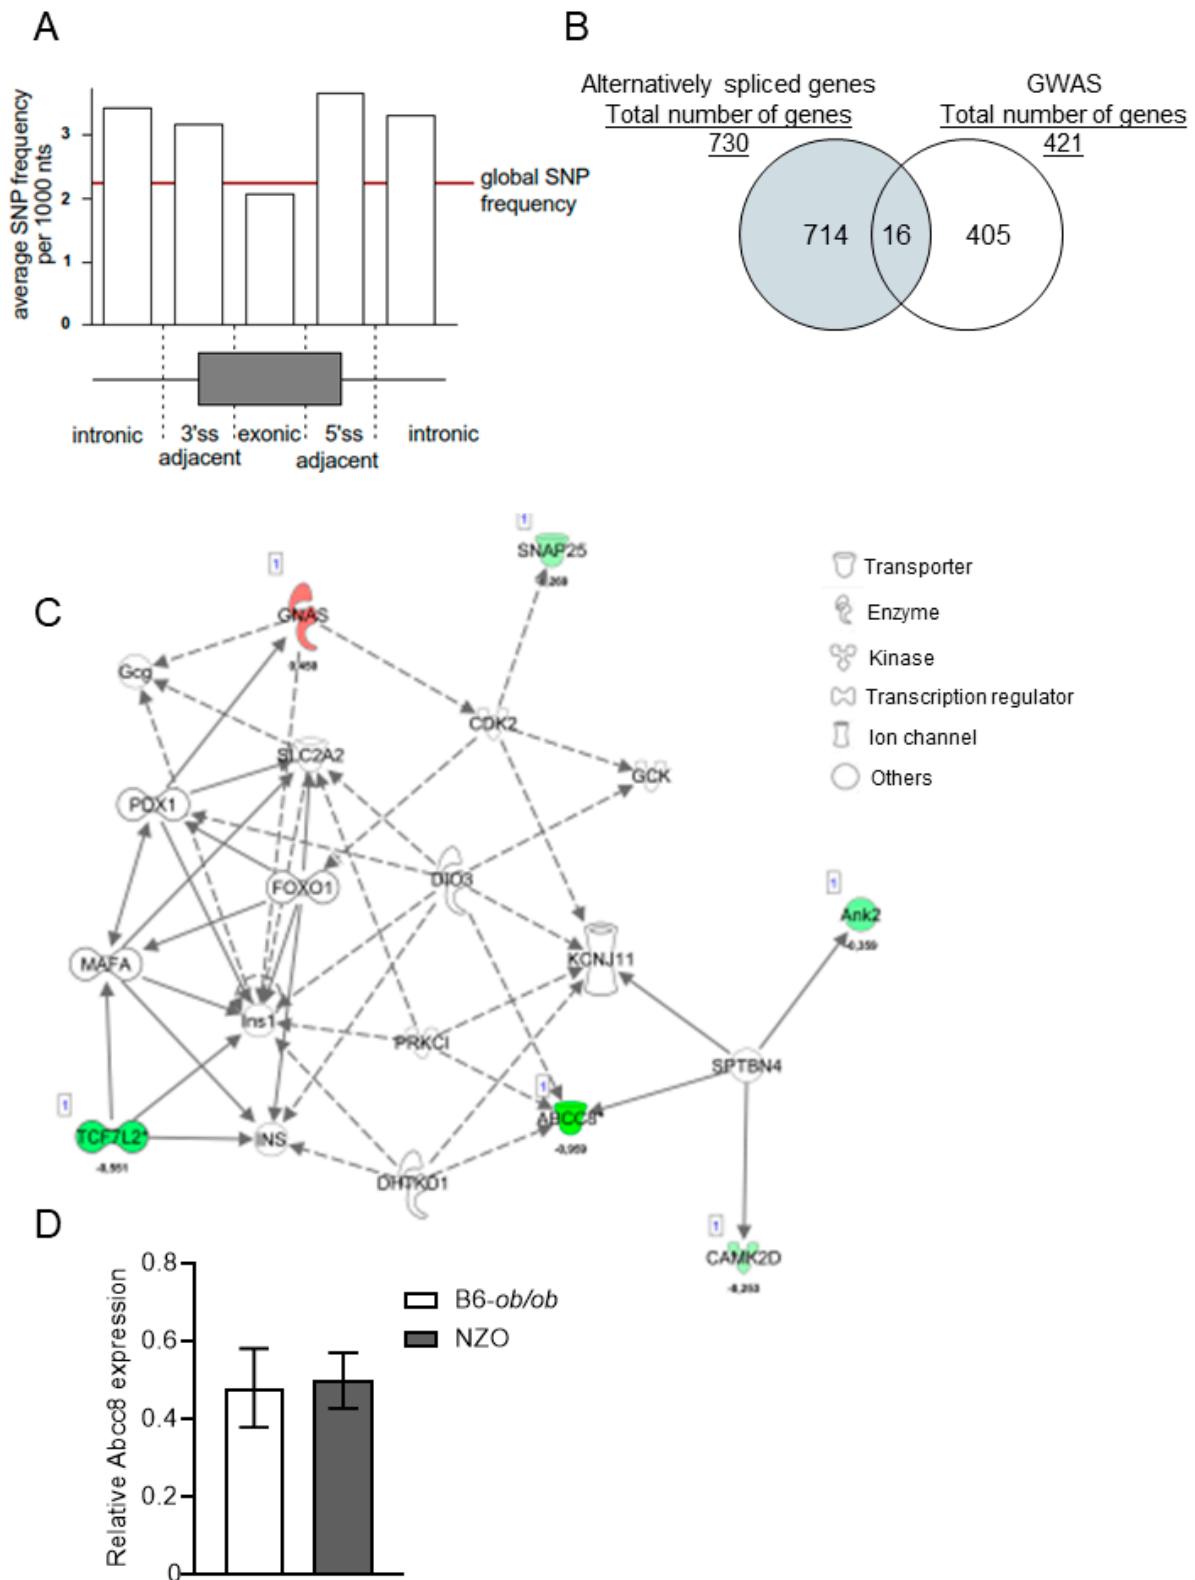

**Supplemental Figure S2.** **A** SNP frequency at indicated positions adjacent to alternative exons. Red line represents global SNP frequency. **B** Venn diagram showing the overlay of differentially spliced genes in islets of diabetes susceptible mice and human T2D genes identified by GWAS. **C** Network of genes with alternatively spliced cassette exons generated by Ingenuity Pathway Analysis (IPA). Green = negative  $\Delta$ PSI meaning more exon skipping in islets from NZO mice, red = positive  $\Delta$ PSI. **D** Relative expression of *Abcc8* in islets from male B6-*ob/ob* and NZO mice treated as described in Figure 1A (n = 4). Data is shown as mean  $\pm$  SD, \*  $p \leq 0.05$ , student's t-test with Welch's correction.
